# Supplementary material for: Immunofocusing and enhancing autologous Tier-2 HIV-1 neutralization by displaying Env trimers on two-component protein nanoparticles
Source: PubMed Central journal article supplement (PMC7873233; doi:10.1038/s41541-021-00285-9), 2021-02-09
Supplement: 41541_2021_285_MOESM1_ESM.pdf [file 41541_2021_285_MOESM1_ESM.pdf]

# Supplementary Information

## Immunofocusing and enhancing autologous Tier-2 HIV-1 neutralization by displaying Env trimers on two-component protein nanoparticles

Philip J. M. Brouwer<sup>1</sup>, Aleksandar Antanasijevic<sup>2</sup>, Marlon de Gast<sup>1</sup>, Joel D. Allen<sup>3</sup>, Tom P. L. Bijl<sup>1</sup>, Anila Yasmeen<sup>4</sup>, Rashmi Ravichandran<sup>5,6</sup>, Judith A. Burger<sup>1</sup>, Gabriel Ozorowski<sup>2</sup>, Jonathan L. Torres<sup>2</sup>, Celia LaBranche<sup>7</sup>, David C. Montefiori<sup>7</sup>, Rajesh P. Ringe<sup>4,‡</sup>, Marit J. van Gils<sup>1</sup>, John P. Moore<sup>4</sup>, Per Johan Klasse<sup>4</sup>, Max Crispin<sup>3</sup>, Neil P. King<sup>5,6,\*</sup>, Andrew B. Ward<sup>2,\*</sup>, Rogier W. Sanders<sup>1,4\*</sup>

### Affiliations:

<sup>1</sup>Department of Medical Microbiology, Amsterdam UMC, University of Amsterdam, Amsterdam Infection & Immunity Institute, 1105AZ Amsterdam, The Netherlands

<sup>2</sup>Department of Integrative Structural and Computational Biology, The Scripps Research Institute, La Jolla, CA 92037, USA

<sup>3</sup>School of Biological Sciences, University of Southampton, Southampton SO17 1BJ, UK

<sup>4</sup>Department of Microbiology and Immunology, Weill Medical College of Cornell University, New York, NY 10065, USA

<sup>5</sup>Department of Biochemistry, University of Washington, Seattle, WA 98195, USA

<sup>6</sup>Institute for Protein Design, University of Washington, Seattle, WA 98195, USA

<sup>7</sup>Department of Surgery, Duke University Medical Center, Durham, NC 27710, USA

<sup>‡</sup>Present address: Institute of Microbial Technology, Chandigarh, 160036, India

\*Corresponding author: [r.w.sanders@amsterdamumc.nl](mailto:r.w.sanders@amsterdamumc.nl); [andrew@scripps.edu](mailto:andrew@scripps.edu); [neil@ipd.uw.edu](mailto:neil@ipd.uw.edu)

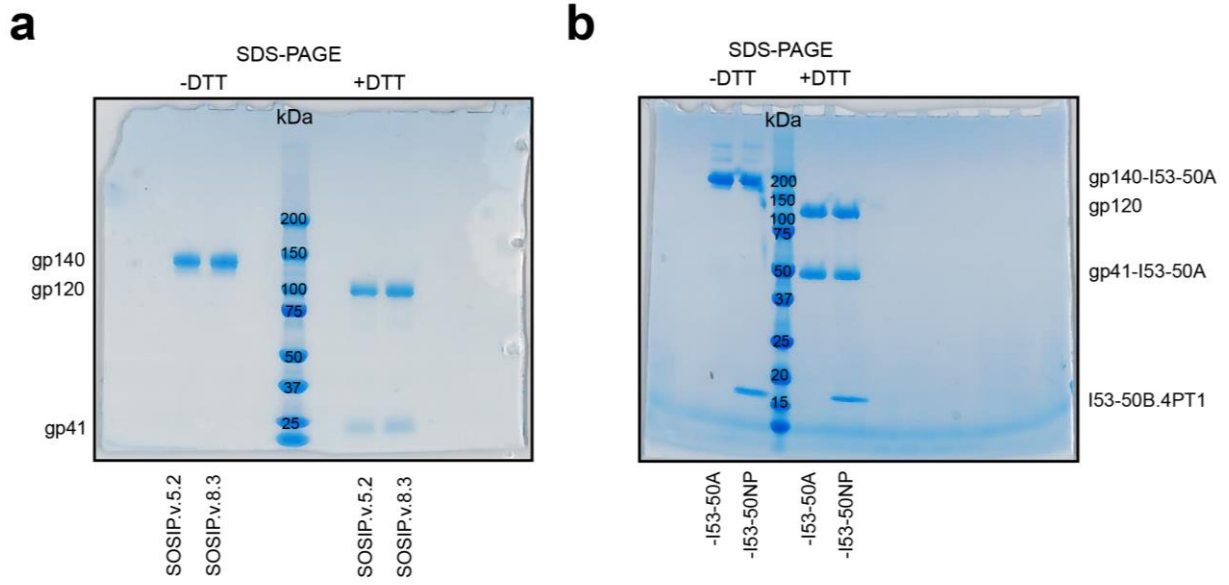

**Supplementary Fig. 1.** Biophysical characterization of 16055 SOSIPs, 16055 SOSIP-I53-50A, and 16055 SOSIP-I53-50NP **a** Non-reducing (-DTT) and reducing (+DTT) SDS-PAGE of 16055 SOSIP.v.5.2 and 16055 SOSIP.v.8.3. **b** As panel-a but for 16055 SOSIP-I53-50A and 16055 SOSIP-I53-50NP.

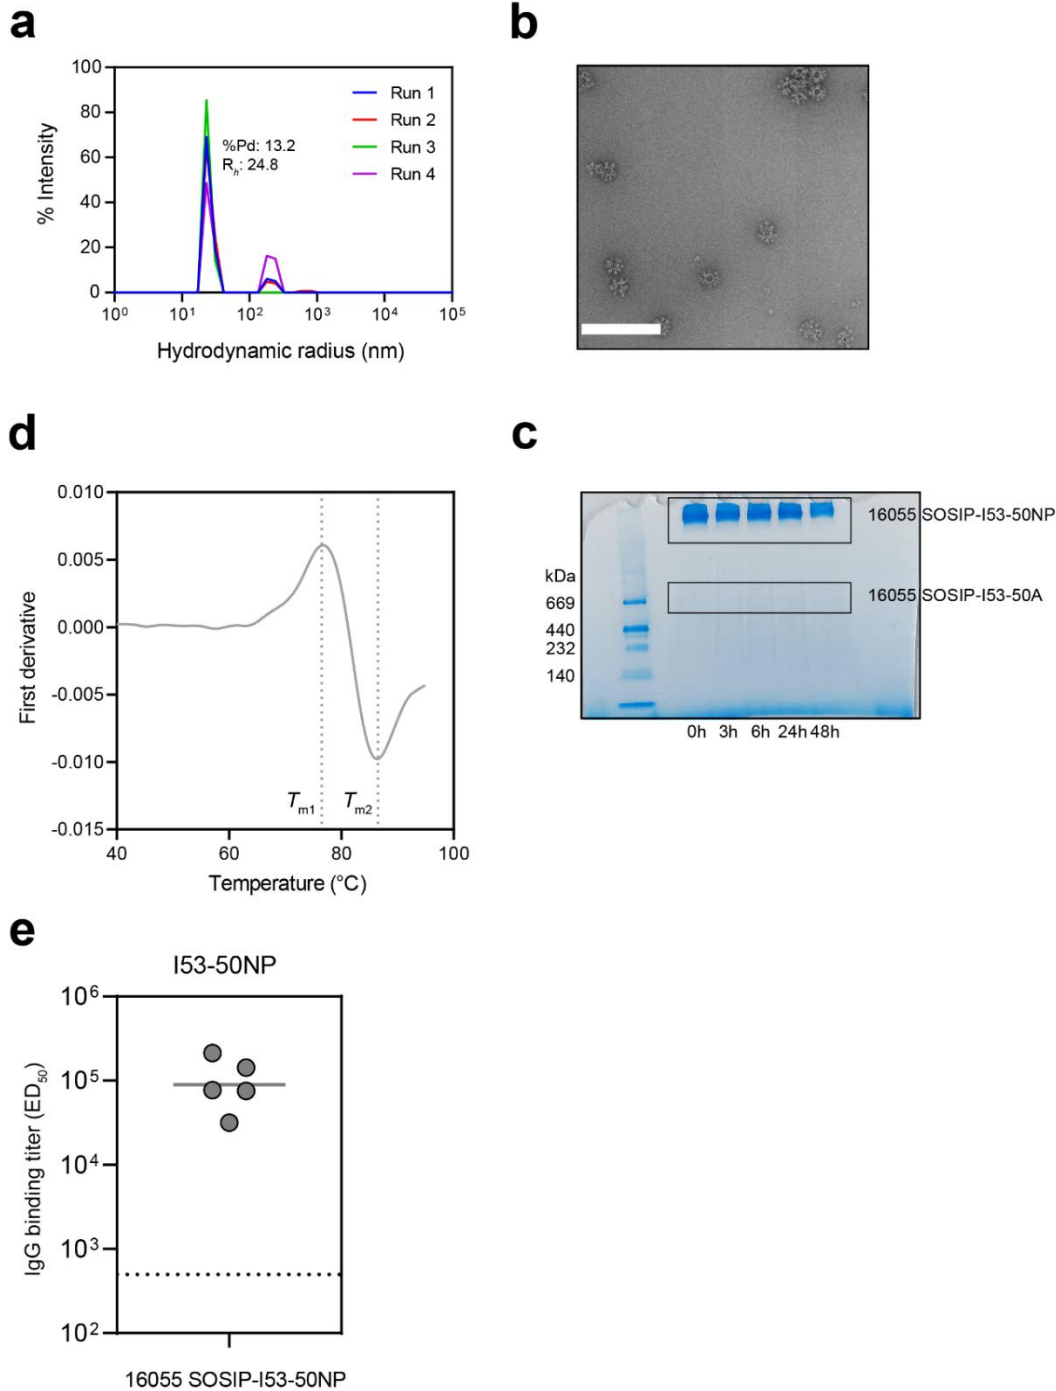

**Supplementary Fig. 2.** Biophysical characterization of 16055 SOSIP-I53-50NPs and the immunogenicity of the I53-50NP core. **a** Dynamic light scattering data of 16055 SOSIP-I53-50NPs. Average polydispersity (%Pd) and hydrodynamic radius ( $R_h$ ) are shown for the non-aggregated 16055 SOSIP-I53-50NP population. A %Pd < 15 is considered a monodisperse population. An overlay of four individual runs is shown. **b** Raw nsEM micrograph of 16055 SOSIP-I53-50NPs showing the small percentage of aggregates. White scale bar corresponds to 200 nm. **c** Thermostability of 16055 SOSIP-I53-50NP as determined by NanoDSF. The dotted lines indicate the melting temperatures of the 16055 SOSIP ( $T_{m1}$ ) and I53-50NP core ( $T_{m2}$ ). Representative melting curve of three technical replicates is shown. **d** Native-PAGE of 16055 SOSIP-I53-50NP incubated at 37 $^{\circ}\text{C}$  in PBS for 0, 3, 6, 24 and 48 h. The upper box indicates the band for 16055 SOSIP-I53-50NPs whereas the lower indicates where a 16055

SOSIP-I53-50A band would have been visible upon nanoparticle disassembly. **e** Midpoint binding titers against I53-50NPs from week 22 rabbits sera of 16055 SOSIP-I35-50NP recipients. Horizontal bar indicates the geometric mean. The dotted line indicates the lowest dilution.

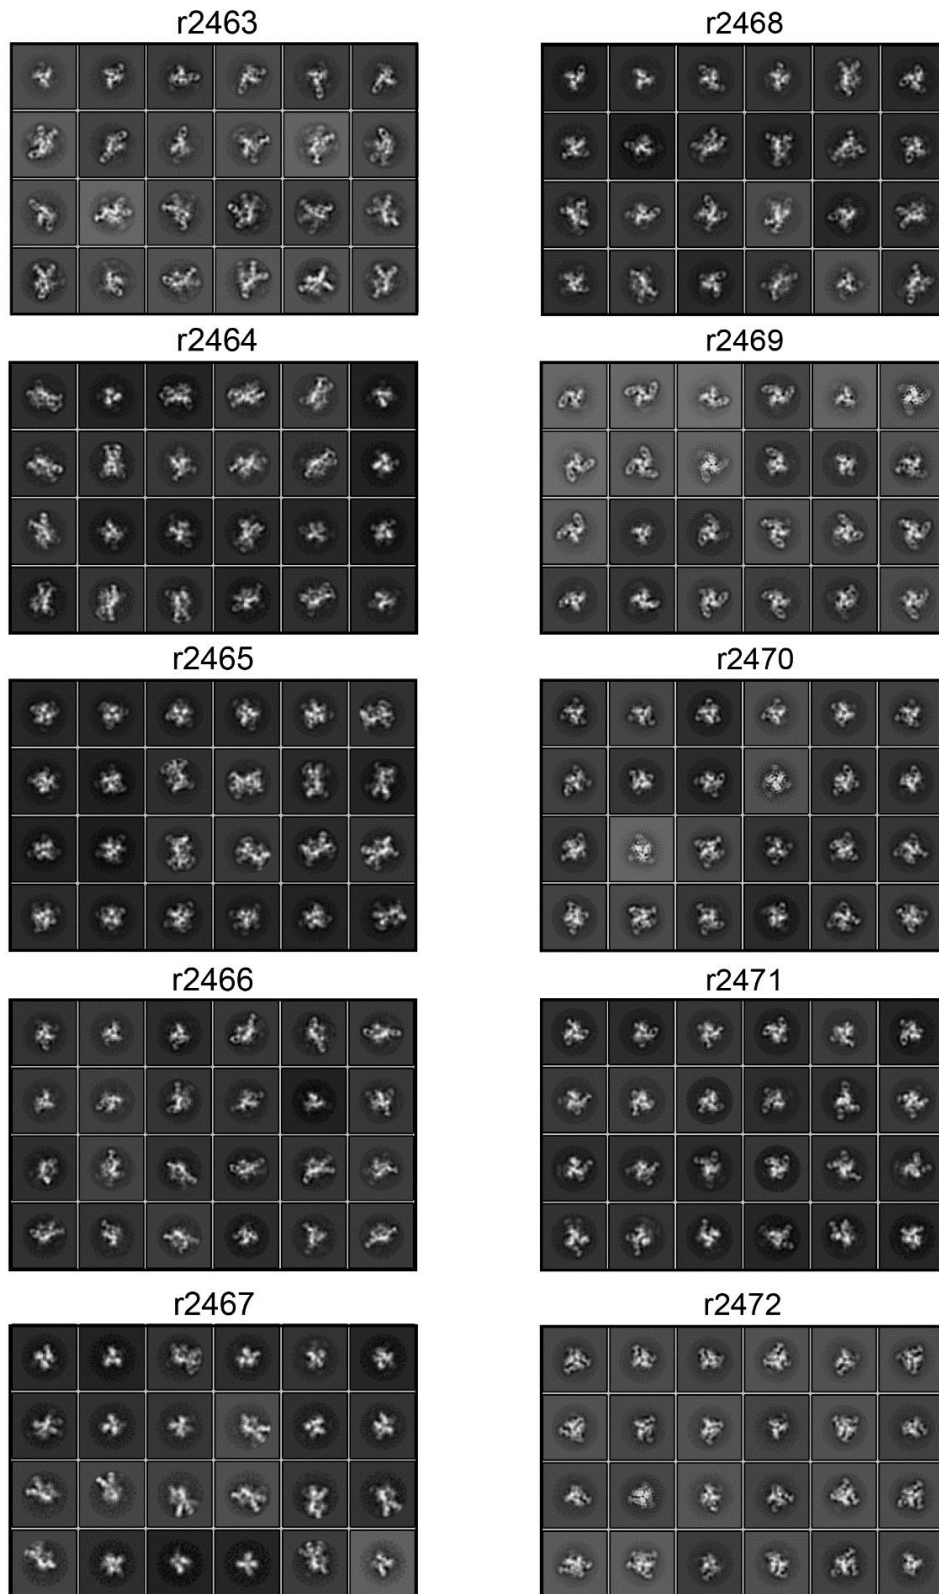

**Supplementary Fig.3.** Representative 2D class averages of 16055 SOSIP trimers complexed with polyclonal Fabs from rabbit sera with IDs indicated above.

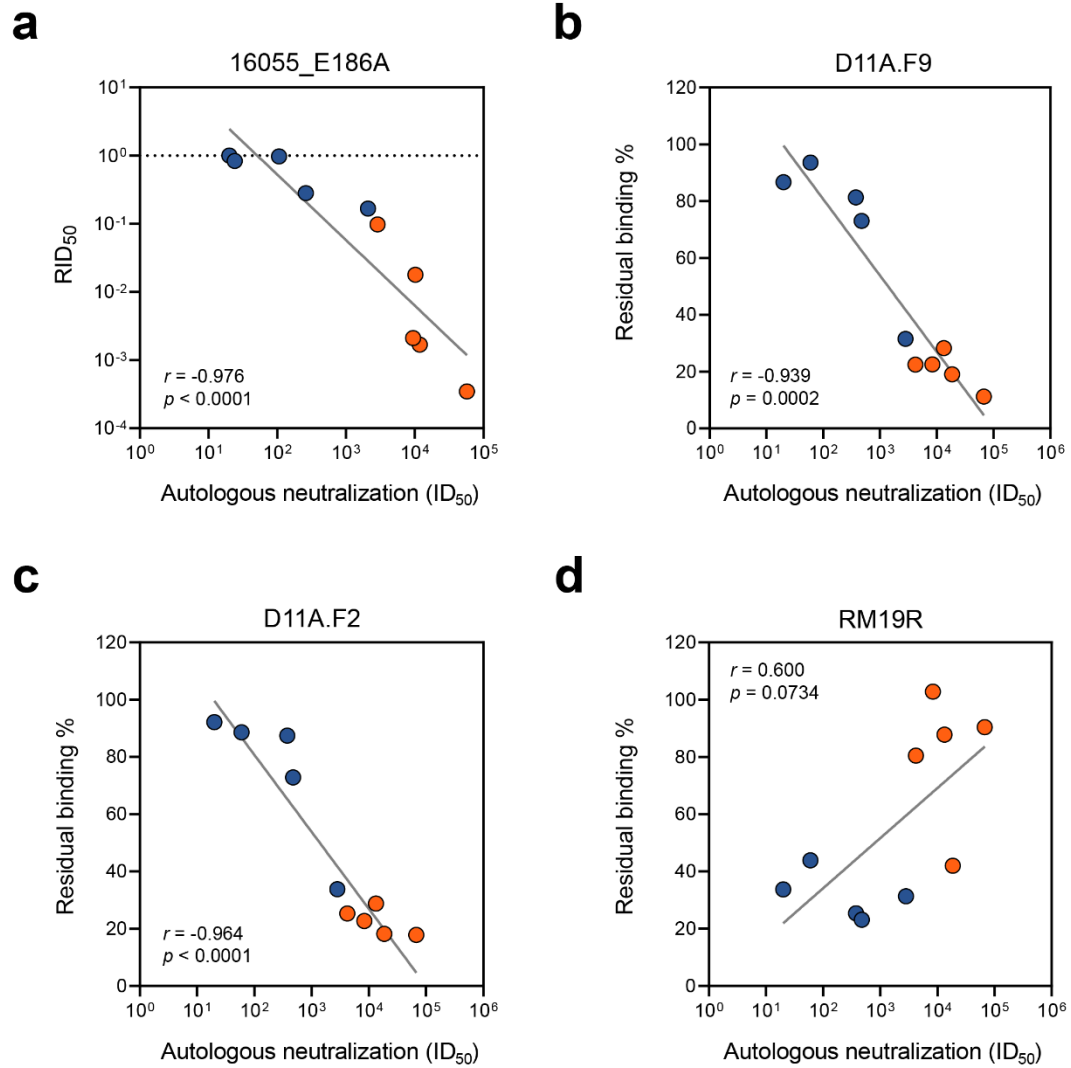

**Supplementary Fig. 4.** Epitope mapping of NAb responses in rabbits immunized with 16055 SOSIP or 16055 SOSIP-I53-50NPs. **a** Correlation plot of RID<sub>50</sub> versus 16055 midpoint neutralization titers. **b** Correlation plot of D11A.F9 competition versus 16055 midpoint neutralization titers. **c** The same as b but then for D11A.F2 **d** The same as b but then for RM19R. **a-d** The  $r$  and  $p$  value is shown for non-parametric Spearman rank correlation. Blue and orange symbols represent individual rabbits immunized with 16055 SOSIP or 16055 SOSIP-I53-50NPs, respectively.

|      | Mutation               | SOSIP nomenclature |    |      |      |                               | Reference                                             |
|------|------------------------|--------------------|----|------|------|-------------------------------|-------------------------------------------------------|
|      |                        | v4                 | v5 | v8.1 | v8.2 | v8.3                          |                                                       |
|      | 501C-605C              |                    |    |      |      |                               | Sanders et al., Plos Pathogens 2013                   |
|      | 559P                   |                    |    |      |      |                               |                                                       |
|      | R6                     |                    |    |      |      |                               |                                                       |
|      | .664                   |                    |    |      |      |                               |                                                       |
|      | 448N                   |                    |    |      |      |                               |                                                       |
|      | 64K/66R <sup>a</sup>   |                    |    |      |      |                               | de Taeye et al., Cell 2015; Dey et al., Virology 2008 |
|      | 315Q                   |                    |    |      |      |                               |                                                       |
|      | 316W                   |                    |    |      |      |                               |                                                       |
|      | 535M <sup>b</sup>      |                    |    |      |      |                               |                                                       |
|      | 543N/543Q <sup>c</sup> |                    |    |      |      |                               |                                                       |
|      | 73C-561C <sup>d</sup>  |                    |    |      |      |                               | Torrents de la Pena et al., Cell Reports 2017         |
| TD8  | 47D                    |                    |    |      |      |                               | Guenaga et al., Journal of Virology 2016              |
|      | 49E                    |                    |    |      |      |                               |                                                       |
|      | 65K                    |                    |    |      |      |                               |                                                       |
|      | 106T                   |                    |    |      |      |                               |                                                       |
|      | 165L                   |                    |    |      |      |                               |                                                       |
|      | 429R                   |                    |    |      |      |                               |                                                       |
|      | 432Q                   |                    |    |      |      |                               |                                                       |
|      | 500R                   |                    |    |      |      |                               |                                                       |
| MD39 | 106E                   |                    |    |      |      |                               | Steichen et al., Immunity 2017                        |
|      | 271I                   |                    |    |      |      |                               |                                                       |
|      | 288L                   |                    |    |      |      |                               |                                                       |
|      | 304V                   |                    |    |      |      |                               |                                                       |
|      | 319Y                   |                    |    |      |      |                               |                                                       |
|      | 363Q <sup>e</sup>      |                    |    |      |      |                               |                                                       |
|      | 519S                   |                    |    |      |      |                               |                                                       |
|      | 561P <sup>f</sup>      |                    |    |      |      |                               |                                                       |
|      | 568D                   |                    |    |      |      |                               |                                                       |
| 570H |                        |                    |    |      |      |                               |                                                       |
| 585H |                        |                    |    |      |      | Guenaga et al., Immunity 2017 |                                                       |
| 569G |                        |                    |    |      |      |                               |                                                       |

**Supplementary Table 1.** Overview of mutations that make up SOSIP v4-v8.3.

<sup>a</sup> The variant 64K (v4.1) is used for BG505 and B41; while the variant 66R (v4.2) is used for the rest of strains.

<sup>b</sup> This mutation was not introduced in 16055 SOSIP.

<sup>c</sup> de Taeye et al. identified two variants (543N and 543Q) with positive effects. 16055 naturally contains a Q at position 543.

<sup>d</sup> 72C-564C (v5.1) is an alternative disulfide bond that works as well as 73C-561C (v5.2), but we generally work with the latter.

<sup>e</sup> Is left out in several genotypes (BG505) as it introduces a glycan hole. This is not the case for 16055.

<sup>f</sup> Mutation 561P (Steichen et al, Immunity 2017) is not included, as we routinely introduce a Cys in this position for the v5 disulfide bond.

## 16055 SOSIP

|              | 88 | 160 | 187 | 197 | 262 | 276 | 289 | 301 | 360 | 386 | 409 | 442 | 448 | 463 | 611 | 616 | 625 | 637 |
|--------------|----|-----|-----|-----|-----|-----|-----|-----|-----|-----|-----|-----|-----|-----|-----|-----|-----|-----|
| High Mannose | 41 | 65  | 56  | 34  | 100 | 90  | 100 | 62  | 100 | 100 | 49  | 93  | 100 | 43  | 0   | 1   | 35  | 84  |
| M9           | 0  | 1   | 0   | 0   | 83  | 0   | 68  | 0   | 68  | 78  | 0   | 17  | 5   | 0   | 0   | 0   | 0   | 0   |
| M8           | 0  | 11  | 0   | 13  | 14  | 7   | 28  | 0   | 20  | 20  | 0   | 67  | 67  | 0   | 0   | 0   | 0   | 0   |
| M7           | 0  | 3   | 0   | 13  | 1   | 1   | 4   | 0   | 10  | 2   | 0   | 1   | 14  | 0   | 0   | 1   | 5   | 17  |
| M6           | 8  | 19  | 0   | 4   | 1   | 43  | 0   | 0   | 1   | 0   | 0   | 4   | 8   | 0   | 0   | 0   | 0   | 24  |
| M5           | 27 | 28  | 54  | 0   | 0   | 33  | 0   | 62  | 0   | 0   | 49  | 3   | 5   | 39  | 0   | 0   | 29  | 32  |
| M4           | 0  | 1   | 0   | 0   | 0   | 1   | 0   | 0   | 1   | 0   | 0   | 0   | 1   | 0   | 0   | 0   | 0   | 3   |
| M3           | 0  | 0   | 0   | 0   | 0   | 0   | 0   | 0   | 0   | 0   | 0   | 0   | 0   | 0   | 0   | 0   | 0   | 0   |
| Hybrid       | 5  | 1   | 0   | 2   | 0   | 2   | 0   | 0   | 0   | 0   | 0   | 0   | 0   | 2   | 0   | 0   | 0   | 7   |
| FHybrid      | 0  | 0   | 2   | 1   | 0   | 0   | 0   | 0   | 0   | 0   | 0   | 0   | 0   | 2   | 0   | 0   | 0   | 0   |
| HexNAc       | 1  | 0   | 0   | 1   | 0   | 1   | 0   | 0   | 0   | 0   | 0   | 0   | 0   | 1   | 0   | 0   | 0   | 1   |
| A1           | 10 | 1   | 2   | 0   | 0   | 2   | 0   | 0   | 0   | 0   | 0   | 0   | 0   | 0   | 0   | 0   | 0   | 6   |
| FA1          | 0  | 0   | 2   | 7   | 0   | 0   | 0   | 35  | 0   | 0   | 39  | 0   | 0   | 10  | 0   | 0   | 3   | 3   |
| A2/A1B       | 1  | 0   | 1   | 0   | 0   | 1   | 0   | 0   | 0   | 0   | 0   | 0   | 0   | 0   | 0   | 0   | 7   | 0   |
| FA2/FA1B     | 17 | 1   | 36  | 3   | 0   | 0   | 0   | 0   | 0   | 0   | 13  | 0   | 0   | 41  | 0   | 0   | 36  | 2   |
| A3/A2B       | 4  | 0   | 0   | 0   | 0   | 0   | 0   | 0   | 0   | 0   | 0   | 0   | 0   | 0   | 0   | 0   | 0   | 0   |
| FA3/FA2B     | 19 | 0   | 3   | 0   | 0   | 0   | 0   | 0   | 0   | 0   | 0   | 0   | 0   | 4   | 0   | 0   | 11  | 2   |
| A4/A3B       | 0  | 0   | 0   | 0   | 0   | 0   | 0   | 0   | 0   | 0   | 0   | 0   | 0   | 0   | 0   | 0   | 0   | 0   |
| FA4/FA3B     | 0  | 0   | 0   | 0   | 0   | 0   | 0   | 0   | 0   | 0   | 0   | 0   | 0   | 1   | 0   | 0   | 0   | 0   |
| Unoccupied   | 6  | 34  | 1   | 56  | 0   | 7   | 0   | 3   | 0   | 0   | 0   | 7   | 0   | 0   | 0   | 60  | 3   | 2   |

|              | 88 | 136 | 139 | 145 | 156 | 160 | 187 | 197 | 230 | 234 | 241 | 262 | 276 | 289 | 301 | 360 | 386 | 392 | 399 | 404 | 409 | 442 | 448 | 463 | 611 | 616 | 625 | 637 |
|--------------|----|-----|-----|-----|-----|-----|-----|-----|-----|-----|-----|-----|-----|-----|-----|-----|-----|-----|-----|-----|-----|-----|-----|-----|-----|-----|-----|-----|
| High Mannose | 42 | 69  | 69  | 0   | 63  | 65  | 56  | 34  | 35  | 100 | 94  | 100 | 90  | 100 | 62  | 100 | 100 | 0   | 49  | 93  | 100 | 43  | 8   | 1   | 35  | 84  |     |     |
| Complex      | 52 | 18  | 31  | 100 | 1   | 2   | 43  | 11  | 0   | 0   | 0   | 0   | 3   | 0   | 35  | 0   | 0   | 100 | 51  | 0   | 0   | 57  | 63  | 39  | 62  | 14  |     |     |
| Unoccupied   | 6  | 14  | 0   | 0   | 36  | 34  | 1   | 56  | 65  | 0   | 6   | 0   | 7   | 0   | 3   | 0   | 0   | 0   | 0   | 7   | 0   | 0   | 29  | 60  | 3   | 2   |     |     |

## 16055 SOSIP-I53-50A

|              | 88 | 145 | 156 | 160 | 187 | 197 | 234 | 241 | 262 | 276 | 289 | 301 | 360 | 386 | 409 | 442 | 448 | 463 | 625 | 637 |
|--------------|----|-----|-----|-----|-----|-----|-----|-----|-----|-----|-----|-----|-----|-----|-----|-----|-----|-----|-----|-----|
| High Mannose | 69 | 58  | 44  | 84  | 56  | 66  | 100 | 0   | 100 | 97  | 100 | 82  | 99  | 100 | 42  | 97  | 98  | 16  | 86  | 93  |
| M9           | 0  | 0   | 23  | 0   | 0   | 0   | 76  | 100 | 89  | 1   | 18  | 7   | 74  | 80  | 0   | 73  | 0   | 0   | 0   | 0   |
| M8           | 0  | 0   | 17  | 0   | 0   | 25  | 24  | 0   | 11  | 13  | 58  | 0   | 20  | 18  | 0   | 4   | 87  | 0   | 0   | 17  |
| M7           | 0  | 4   | 0   | 12  | 0   | 12  | 0   | 0   | 0   | 11  | 25  | 0   | 1   | 2   | 7   | 0   | 0   | 0   | 1   | 40  |
| M6           | 30 | 0   | 1   | 29  | 13  | 0   | 0   | 0   | 1   | 43  | 0   | 6   | 0   | 1   | 2   | 7   | 7   | 9   | 0   | 5   |
| M5           | 33 | 46  | 3   | 39  | 41  | 17  | 0   | 0   | 0   | 26  | 0   | 64  | 1   | 0   | 33  | 11  | 2   | 1   | 84  | 28  |
| M4           | 1  | 0   | 0   | 0   | 1   | 0   | 0   | 0   | 0   | 1   | 0   | 0   | 0   | 0   | 0   | 0   | 1   | 0   | 0   | 1   |
| M3           | 0  | 0   | 0   | 0   | 0   | 0   | 0   | 0   | 0   | 0   | 0   | 0   | 0   | 0   | 0   | 0   | 0   | 0   | 0   | 0   |
| Hybrid       | 3  | 0   | 0   | 2   | 0   | 6   | 0   | 0   | 0   | 0   | 0   | 0   | 1   | 0   | 0   | 0   | 0   | 0   | 1   | 0   |
| FHybrid      | 0  | 0   | 0   | 0   | 0   | 0   | 0   | 0   | 0   | 0   | 0   | 0   | 0   | 0   | 0   | 0   | 0   | 1   | 0   | 0   |
| HexNAc       | 2  | 9   | 0   | 2   | 1   | 6   | 0   | 0   | 0   | 1   | 0   | 5   | 1   | 0   | 0   | 2   | 0   | 5   | 0   | 3   |
| A1           | 8  | 0   | 0   | 1   | 3   | 0   | 0   | 0   | 0   | 2   | 0   | 0   | 0   | 0   | 0   | 0   | 2   | 4   | 0   | 0   |
| FA1          | 0  | 5   | 0   | 0   | 0   | 0   | 0   | 0   | 0   | 0   | 0   | 0   | 0   | 0   | 0   | 0   | 1   | 40  | 0   | 2   |
| A2/A1B       | 12 | 0   | 0   | 0   | 1   | 0   | 0   | 0   | 0   | 0   | 0   | 0   | 0   | 0   | 0   | 0   | 0   | 5   | 7   | 0   |
| FA2/FA1B     | 0  | 4   | 0   | 0   | 40  | 13  | 0   | 0   | 0   | 0   | 0   | 0   | 0   | 0   | 0   | 0   | 0   | 24  | 1   | 4   |
| A3/A2B       | 3  | 0   | 0   | 0   | 0   | 0   | 0   | 0   | 0   | 0   | 0   | 0   | 0   | 0   | 0   | 0   | 0   | 0   | 1   | 0   |
| FA3/FA2B     | 7  | 0   | 0   | 0   | 1   | 3   | 0   | 0   | 0   | 0   | 0   | 0   | 0   | 0   | 20  | 0   | 0   | 8   | 4   | 1   |
| A4/A3B       | 0  | 0   | 0   | 0   | 0   | 0   | 0   | 0   | 0   | 0   | 0   | 0   | 0   | 0   | 0   | 0   | 0   | 0   | 0   | 0   |
| FA4/FA3B     | 0  | 0   | 0   | 0   | 0   | 0   | 0   | 0   | 0   | 0   | 0   | 0   | 0   | 0   | 0   | 0   | 0   | 4   | 0   | 0   |
| Unoccupied   | 0  | 32  | 56  | 15  | 0   | 17  | 0   | 0   | 0   | 1   | 0   | 18  | 1   | 0   | 37  | 2   | 0   | 0   | 0   | 0   |

|              | 88 | 136 | 139 | 145 | 156 | 160 | 187 | 197 | 230  | 234 | 241 | 262 | 276 | 289 | 301 | 360 | 386 | 392  | 399  | 404 | 409 | 442 | 448 | 463 | 611 | 616 | 625 | 637 |
|--------------|----|-----|-----|-----|-----|-----|-----|-----|------|-----|-----|-----|-----|-----|-----|-----|-----|------|------|-----|-----|-----|-----|-----|-----|-----|-----|-----|
| High Mannose | 69 | 97  | 93  | 58  | 44  | 84  | 56  | 66  | n.d. | 100 | 100 | 100 | 97  | 100 | 82  | 99  | 100 | n.d. | n.d. | 0   | 42  | 97  | 98  | 16  | 41  | 14  | 86  | 93  |
| Complex      | 30 | 0   | 0   | 10  | 0   | 1   | 44  | 17  | n.d. | 0   | 0   | 0   | 3   | 0   | 0   | 0   | 0   | n.d. | n.d. | 100 | 20  | 2   | 2   | 84  | 42  | 44  | 13  | 7   |
| Unoccupied   | 0  | 3   | 7   | 32  | 56  | 15  | 0   | 17  | n.d. | 0   | 0   | 0   | 1   | 0   | 18  | 1   | 0   | n.d. | n.d. | 0   | 37  | 2   | 0   | 0   | 16  | 42  | 0   | 0   |

**Supplementary Table 2.** Glycan composition of 16055 SOSIP and 16055 SOSIP-I53-50A. Glycoforms are shown for each PNGS of 16055 SOSIP (top) and 16055 SOSIP-I53-50A (bottom), with each number representing the percentage of the specific glycoform as stated in the left column. Oligomannos/hybrid-type glycans are shaded in green and complex glycans are shaded in pink. The absence of a glycan is shaded in grey. Glycoforms are categorized according to the number of mannose residues (M3-M9), hybrid glycans by the presence/absence of fucose (FHybrid and Hybrid), and complex glycans by the presence/absence of fucose and the number of antenna. The upper table for each construct contains a breakdown of compositions obtained using intact glycopeptides. The percentages in lower table are obtained by using glycosidase-treated peptides (see Methods for details). Sites that appear in the lower table but not the upper are those that could not be obtained



## Week 6

|                      | Virus     | Control |      | Autologous |      |
|----------------------|-----------|---------|------|------------|------|
|                      |           | MLV     |      | 16055      |      |
|                      |           | -       |      | 2          |      |
|                      |           | -       |      | C          |      |
| Tier                 | -         |         | C    |            |      |
| Clade                | -         |         | C    |            |      |
| Lab                  | AMC       | DUMC    | AMC  | DUMC       |      |
| Immunogen            | Rabbit ID |         |      |            |      |
| 16055 SOSIP          | 2463      | 27      | n.d. | 20         | n.d. |
|                      | 2464      | 21      | n.d. | <20        | n.d. |
|                      | 2465      | 54      | n.d. | 92         | n.d. |
|                      | 2466      | <20     | n.d. | <20        | n.d. |
|                      | 2467      | <20     | n.d. | <20        | n.d. |
| 16055 SOSIP-I53-50NP | 2468      | <20     | n.d. | 87         | n.d. |
|                      | 2469      | 22      | n.d. | 55         | n.d. |
|                      | 2470      | <20     | n.d. | <20        | n.d. |
|                      | 2471      | 20      | n.d. | 92         | n.d. |
|                      | 2472      | 22      | n.d. | 26         | n.d. |

## Week 22

|                      | Virus     | Control |     | Autologous |       | Heterologous |       |
|----------------------|-----------|---------|-----|------------|-------|--------------|-------|
|                      |           | MLV     |     | 16055      |       | SF162        | MW965 |
|                      |           | -       |     | 2          |       | 1A           | 1A    |
|                      |           | -       |     | C          |       | B            | C     |
| Tier                 | -         |         | C   |            |       |              |       |
| Clade                | -         |         | C   |            |       |              |       |
| Lab                  | AMC       | DUMC    | AMC | DUMC       | AMC   | DUMC         |       |
| Immunogen            | Rabbit ID |         |     |            |       |              |       |
| 16055 SOSIP          | 2463      | <20     | <20 | 20         | 20    | 123          | 1672  |
|                      | 2464      | <20     | <20 | 2814       | 1793  | <20          | 837   |
|                      | 2465      | <20     | <20 | 376        | 158   | <20          | 348   |
|                      | 2466      | <20     | <20 | 60         | 25    | <20          | 108   |
|                      | 2467      | <20     | <20 | 474        | 186   | <20          | 212   |
| 16055 SOSIP-I53-50NP | 2468      | <20     | <20 | 18660      | 4870  | <20          | 479   |
|                      | 2469      | <20     | <20 | 13348      | 4333  | <20          | 109   |
|                      | 2470      | <20     | <20 | 8363       | 2923  | <20          | 3585  |
|                      | 2471      | <20     | <20 | 67677      | 26174 | <20          | 2000  |
|                      | 2472      | <20     | <20 | 4200       | 1550  | <20          | 563   |

**Supplementary Table 3.** Midpoint neutralization titers at week 6 and 22 from rabbits that received 16055 SOSIP or 16055 SOSIP-I53-50NP tested against a panel of Env-pseudoviruses. TZM-bl neutralization assays were performed either at the AMC and/or DUMC as indicated above each column. ID<sub>50</sub> values, i.e. the serum dilution at which infectivity was inhibited by 50%, are shown and color coded: white = no neutralization, ID<sub>50</sub> < 20; grey = very weak neutralization, 20 > ID<sub>50</sub> > 40; yellow = weak neutralization, 40 > ID<sub>50</sub> > 100; orange = moderate neutralization, 100 > ID<sub>50</sub> > 1000; red = strong neutralization, 1000 > ID<sub>50</sub> > 10000; purple = very strong neutralization, ID<sub>50</sub> > 10000. MLV = murine leukemia virus (negative control). n.d. = not determined.

## Week 22

|                      | Virus     | Heterologous |        |                 |           |              |              |          |                |       |   |
|----------------------|-----------|--------------|--------|-----------------|-----------|--------------|--------------|----------|----------------|-------|---|
|                      |           | 25710-2.43   | TRO.11 | BJOX002000.03.2 | Ce1176 A3 | X1632 S2 B10 | 246-F3 C10 2 | CH119.10 | Ce703010217 B6 | CNE55 |   |
|                      |           | 2            | 2      | 2               | 2         | 2            | 2            | 2        | 2              | 2     | 2 |
|                      |           | Clade        |        |                 |           |              |              |          |                |       |   |
| Lab                  | DUMC      | DUMC         | DUMC   | DUMC            | DUMC      | DUMC         | DUMC         | DUMC     | DUMC           | DUMC  |   |
| Immunogen            | Rabbit ID |              |        |                 |           |              |              |          |                |       |   |
| 16055 SOSIP          | 2463      | <20          | <20    | <20             | <20       | <20          | <20          | <20      | <20            | <20   |   |
|                      | 2464      | <20          | <20    | <20             | <20       | <20          | <20          | 25       | <20            | <20   |   |
|                      | 2465      | <20          | <20    | <20             | <20       | 51           | <20          | 28       | 44             | <20   |   |
|                      | 2466      | <20          | <20    | <20             | <20       | <20          | <20          | <20      | 21             | <20   |   |
|                      | 2467      | <20          | <20    | <20             | <20       | <20          | <20          | <20      | <20            | <20   |   |
| 16055 SOSIP-I53-50NP | 2468      | <20          | <20    | <20             | <20       | 28           | <20          | <20      | 34             | <20   |   |
|                      | 2469      | <20          | <20    | <20             | <20       | <20          | <20          | <20      | <20            | <20   |   |
|                      | 2470      | <20          | <20    | <20             | <20       | <20          | <20          | <20      | <20            | <20   |   |
|                      | 2471      | <20          | <20    | <20             | <20       | <20          | <20          | <20      | <20            | <20   |   |
|                      | 2472      | <20          | <20    | <20             | <20       | 40           | <20          | <20      | 24             | <20   |   |

**Supplementary Table 4.** Midpoint neutralization titers at week 22 from rabbits that received 16055 SOSIP or 16055 SOSIP-I53-50NP tested against a panel of heterologous Env-pseudoviruses. TZM-bl neutralization assays were performed at DUMC as indicated above each column. ID<sub>50</sub> values, i.e. the serum dilution at which infectivity was inhibited by 50%, are shown and color coded as shown in the legend for Supplementary Table 3.
