# Supplementary material for: Immunofocusing and enhancing autologous Tier-2 HIV-1 neutralization by displaying Env trimers on two-component protein nanoparticles
Source: PubMed Central journal article supplement (PMC7873233; doi:10.1038/s41541-021-00285-9), 2021-02-09
Supplement: 41541_2021_285_MOESM2_ESM.pdf [file 41541_2021_285_MOESM2_ESM.pdf]

## Reporting Summary

Nature Research wishes to improve the reproducibility of the work that we publish. This form provides structure for consistency and transparency in reporting. For further information on Nature Research policies, see [Authors & Referees](#) and the [Editorial Policy Checklist](#).

### Statistics

For all statistical analyses, confirm that the following items are present in the figure legend, table legend, main text, or Methods section.

n/a Confirmed

- |                                     |                                     |                                                                                                                                                                                                                                                            |
|-------------------------------------|-------------------------------------|------------------------------------------------------------------------------------------------------------------------------------------------------------------------------------------------------------------------------------------------------------|
| <input type="checkbox"/>            | <input checked="" type="checkbox"/> | The exact sample size ( $n$ ) for each experimental group/condition, given as a discrete number and unit of measurement                                                                                                                                    |
| <input type="checkbox"/>            | <input checked="" type="checkbox"/> | A statement on whether measurements were taken from distinct samples or whether the same sample was measured repeatedly                                                                                                                                    |
| <input type="checkbox"/>            | <input checked="" type="checkbox"/> | The statistical test(s) used AND whether they are one- or two-sided<br><i>Only common tests should be described solely by name; describe more complex techniques in the Methods section.</i>                                                               |
| <input checked="" type="checkbox"/> | <input type="checkbox"/>            | A description of all covariates tested                                                                                                                                                                                                                     |
| <input type="checkbox"/>            | <input checked="" type="checkbox"/> | A description of any assumptions or corrections, such as tests of normality and adjustment for multiple comparisons                                                                                                                                        |
| <input type="checkbox"/>            | <input checked="" type="checkbox"/> | A full description of the statistical parameters including central tendency (e.g. means) or other basic estimates (e.g. regression coefficient) AND variation (e.g. standard deviation) or associated estimates of uncertainty (e.g. confidence intervals) |
| <input type="checkbox"/>            | <input checked="" type="checkbox"/> | For null hypothesis testing, the test statistic (e.g. $F$ , $t$ , $r$ ) with confidence intervals, effect sizes, degrees of freedom and $P$ value noted<br><i>Give <math>P</math> values as exact values whenever suitable.</i>                            |
| <input checked="" type="checkbox"/> | <input type="checkbox"/>            | For Bayesian analysis, information on the choice of priors and Markov chain Monte Carlo settings                                                                                                                                                           |
| <input checked="" type="checkbox"/> | <input type="checkbox"/>            | For hierarchical and complex designs, identification of the appropriate level for tests and full reporting of outcomes                                                                                                                                     |
| <input checked="" type="checkbox"/> | <input type="checkbox"/>            | Estimates of effect sizes (e.g. Cohen's $d$ , Pearson's $r$ ), indicating how they were calculated                                                                                                                                                         |

*Our web collection on [statistics for biologists](#) contains articles on many of the points above.*

### Software and code

Policy information about [availability of computer code](#)

Data collection

Leginon software was used for negative-stain microscopy data collection. ChromLab™ Software was used for collection of size-exclusion chromatography data. The Octet® Data Analysis HT software was used for collection of BLI data.

Data analysis

Generally Graphpad Prism 7.0 was used for data and statistical analysis. Appion software was used for nsEM data processing. Relion 3.0 was used for 2D- and 3D-class average data collection. UCSF Chimera 1.13 nwas used for visualization, segmentation and figure preparation of 3D-refined maps. Glycopeptide fragmentation data was analyzed using Byos v3.9 (Protein Metrics Inc.).

For manuscripts utilizing custom algorithms or software that are central to the research but not yet described in published literature, software must be made available to editors/reviewers. We strongly encourage code deposition in a community repository (e.g. GitHub). See the Nature Research [guidelines for submitting code & software](#) for further information.

### Data

Policy information about [availability of data](#)

All manuscripts must include a [data availability statement](#). This statement should provide the following information, where applicable:

- Accession codes, unique identifiers, or web links for publicly available datasets
- A list of figures that have associated raw data
- A description of any restrictions on data availability

Data availability

The data supporting the findings of the study are available from the corresponding authors upon reasonable request. 3D refined models of 16055 SOSIP complexed with polyclonal Fabs were submitted to EMDB. The list of EMDB IDs: 22714 (16055 SOSIP + r2463 Poly Fab); 22715 (16055 SOSIP + r2464 Poly Fab); 22716 (16055 SOSIP + r2465 Poly Fab); 22717 (16055 SOSIP + r2466 Poly Fab); 22718 (16055 SOSIP + r2467 Poly Fab); 22719 (16055 SOSIP + r2468 Poly Fab); 22720 (16055 SOSIP + r2469 Poly Fab); 22721 (16055 SOSIP + r2470 Poly Fab); 22722 (16055 SOSIP + r2471 Poly Fab); 22723 (16055 SOSIP + r2472 Poly Fab).

## Field-specific reporting

Please select the one below that is the best fit for your research. If you are not sure, read the appropriate sections before making your selection.

Life sciences       Behavioural & social sciences       Ecological, evolutionary & environmental sciences

For a reference copy of the document with all sections, see [nature.com/documents/nr-reporting-summary-flat.pdf](https://www.nature.com/documents/nr-reporting-summary-flat.pdf)

## Life sciences study design

All studies must disclose on these points even when the disclosure is negative.

|                 |                                                                                                  |
|-----------------|--------------------------------------------------------------------------------------------------|
| Sample size     | <input type="text" value="No sample-size calculations were performed."/>                         |
| Data exclusions | <input type="text" value="No data was excluded from analyses."/>                                 |
| Replication     | <input type="text" value="All data points were repeated or performed in duplicate/triplicate."/> |
| Randomization   | <input type="text" value="Allocation was random."/>                                              |
| Blinding        | <input type="text" value="Blinding was not relevant for our studies."/>                          |

## Reporting for specific materials, systems and methods

We require information from authors about some types of materials, experimental systems and methods used in many studies. Here, indicate whether each material, system or method listed is relevant to your study. If you are not sure if a list item applies to your research, read the appropriate section before selecting a response.

### Materials & experimental systems

| n/a                                 | Involvement in the study                                        |
|-------------------------------------|-----------------------------------------------------------------|
| <input type="checkbox"/>            | <input checked="" type="checkbox"/> Antibodies                  |
| <input type="checkbox"/>            | <input checked="" type="checkbox"/> Eukaryotic cell lines       |
| <input checked="" type="checkbox"/> | <input type="checkbox"/> Palaeontology                          |
| <input type="checkbox"/>            | <input checked="" type="checkbox"/> Animals and other organisms |
| <input checked="" type="checkbox"/> | <input type="checkbox"/> Human research participants            |
| <input checked="" type="checkbox"/> | <input type="checkbox"/> Clinical data                          |

### Methods

| n/a                                 | Involvement in the study                        |
|-------------------------------------|-------------------------------------------------|
| <input checked="" type="checkbox"/> | <input type="checkbox"/> ChIP-seq               |
| <input checked="" type="checkbox"/> | <input type="checkbox"/> Flow cytometry         |
| <input checked="" type="checkbox"/> | <input type="checkbox"/> MRI-based neuroimaging |

## Antibodies

|                 |                                                                                                                                                                                                                                                         |
|-----------------|---------------------------------------------------------------------------------------------------------------------------------------------------------------------------------------------------------------------------------------------------------|
| Antibodies used | <input type="text" value="Env-specific antibodies were obtained from either Michel Nussenzweig, James Robinson, Dennis Burton, Peter Kwong, Mark Connors, John Mascola or William Olson through the NIH AIDS Research and Reference Reagent Program."/> |
| Validation      | <input type="text" value="N.A."/>                                                                                                                                                                                                                       |

## Eukaryotic cell lines

Policy information about [cell lines](#)

|                                                                   |                                                                                                                                                                                                                                |
|-------------------------------------------------------------------|--------------------------------------------------------------------------------------------------------------------------------------------------------------------------------------------------------------------------------|
| Cell line source(s)                                               | <input type="text" value="HEK293F cells were obtained from Invitrogen, cat no. R79007. Ramos B cells were obtained from Drs. Li Wu and Vineet N. KewalRaman via the NIH AIDS Reagent Program, Division of AIDS, NIAID, NIH."/> |
| Authentication                                                    | <input type="text" value="Cell lines were validated by vendors or collaborators."/>                                                                                                                                            |
| Mycoplasma contamination                                          | <input type="text" value="All cell lines were tested negative for mycoplasma contamination."/>                                                                                                                                 |
| Commonly misidentified lines (See <a href="#">ICLAC</a> register) | <input type="text" value="None."/>                                                                                                                                                                                             |

## Animals and other organisms

---

Policy information about [studies involving animals](#); [ARRIVE guidelines](#) recommended for reporting animal research

Laboratory animals

New Zealand White Rabbits, 2.5-3kg, female.

Wild animals

No wild animals were used.

Field-collected samples

No field-collected samples were used.

Ethics oversight

All procedures performed in rabbits were done by Covance and approved by Denver PA IACUC Committee, #0035-016

Note that full information on the approval of the study protocol must also be provided in the manuscript.
